# Supplementary material for: Robust degradation of tetracycline antibiotic through recyclable Fe3S4/Ti3C2MXene composites
Source: Royal Society of Chemistry journal article supplement (doi:10.1039/d3en00560g), 2023-01-01
Supplement: d3en00560g1.pdf [file d3en00560g1.pdf]

## **Robust Degradation of Tetracycline Antibiotic through Recyclable $\text{Fe}_3\text{S}_4/\text{Ti}_3\text{C}_2\text{MXene}$ Composites**

Pascaline Sanga,<sup>a,b</sup> Jia Chen,<sup>a</sup> Jing Xiao,<sup>a,b</sup> Bei Liu,<sup>a,b</sup> Haitham Saad Al-mashriqi,<sup>a,b</sup> Hongdeng Qiu<sup>a,b,c,\*</sup>

<sup>a</sup> CAS Key Laboratory of Chemistry of Northwestern Plant Resources and Key Laboratory for Natural Medicine of Gansu Province, Lanzhou Institute of Chemical Physics, Chinese Academy of Sciences, Lanzhou 730000, China.

<sup>b</sup> University of Chinese Academy of Sciences, Chinese Academy of Sciences, Beijing 100039, China.

<sup>c</sup> College of Chemistry, Zhengzhou University, Zhengzhou 450001, China.

\* Corresponding e-mail: [hdqiu@licp.cas.cn](mailto:hdqiu@licp.cas.cn) (H. Qiu).

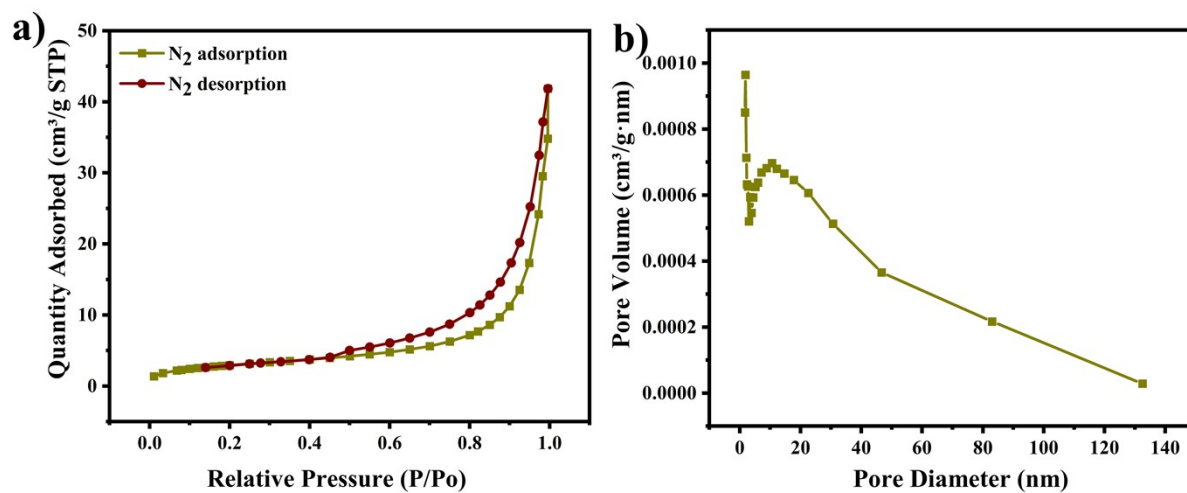

**Fig. S1.** a) N<sub>2</sub> adsorption-desorption isotherms and b) pore size distribution of Fe<sub>3</sub>S<sub>4</sub>/Ti<sub>3</sub>C<sub>2</sub>MXene composite.

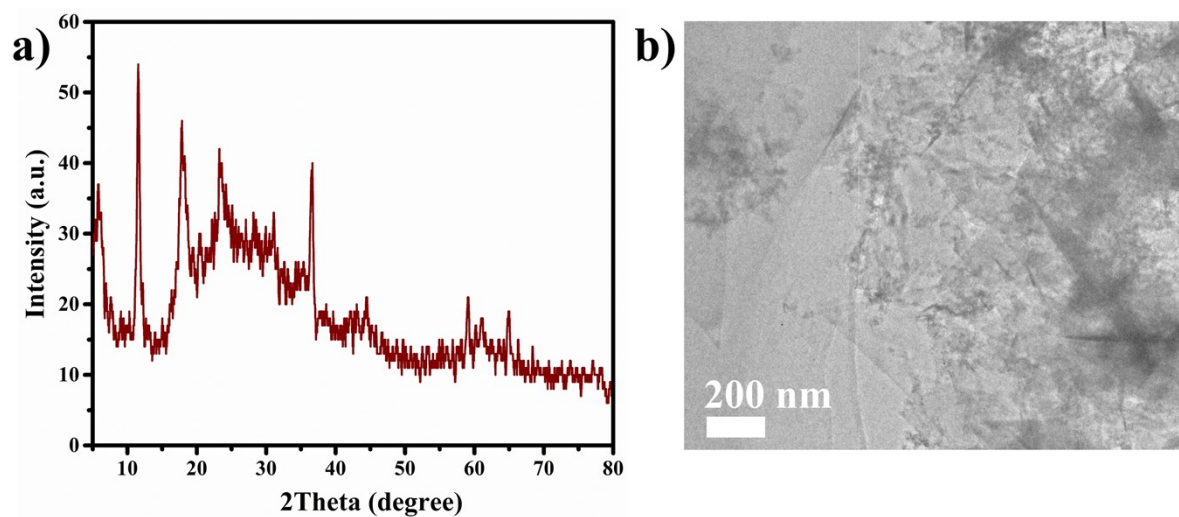

**Fig. S2.** a) XRD and b) TEM of the prepared material using Water instead of DES.

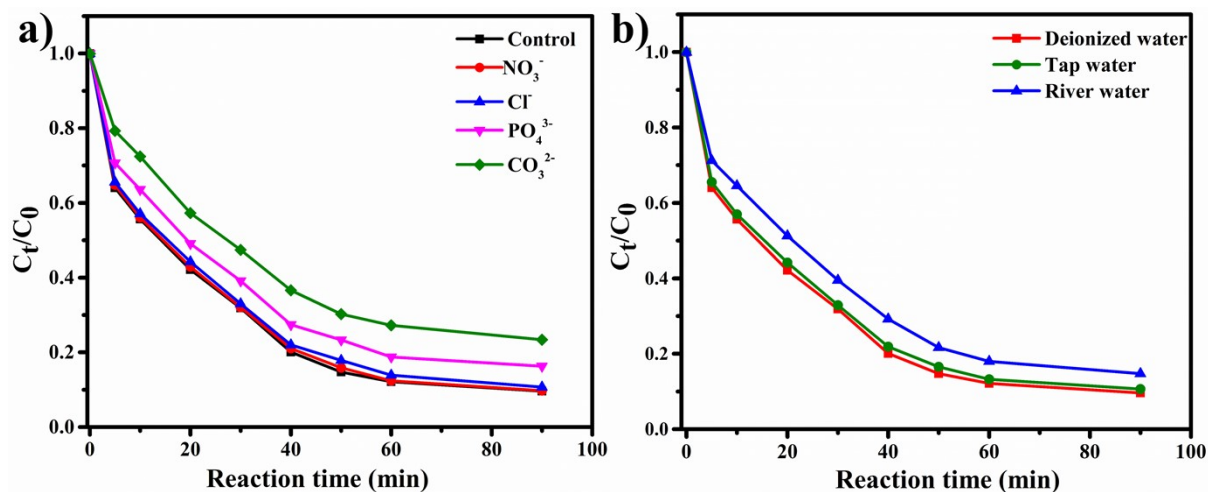

**Fig. S3.** a) Effect of various ions on TC degradation and b) The application of Fe<sub>3</sub>S<sub>4</sub>/Ti<sub>3</sub>C<sub>2</sub>MXene+H<sub>2</sub>O<sub>2</sub> system with the actual water body. Reaction conditions: [H<sub>2</sub>O<sub>2</sub>]:1 mM, solution pH:3, [Fe<sub>3</sub>S<sub>4</sub>/Ti<sub>3</sub>C<sub>2</sub>MXene]:1 g/L, [TC]:100 mg/L, and the reaction time: 90 min at 25 °C.

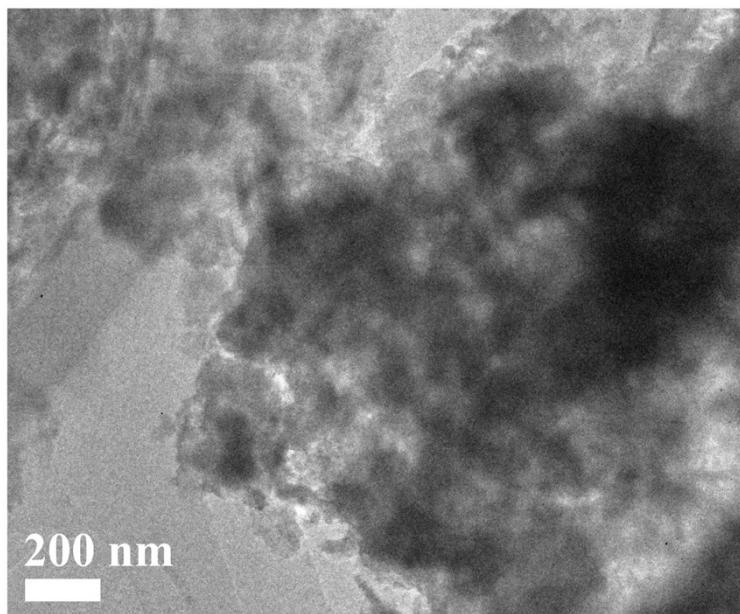

**Fig. S4.** TEM image after 4 cycles of reuse

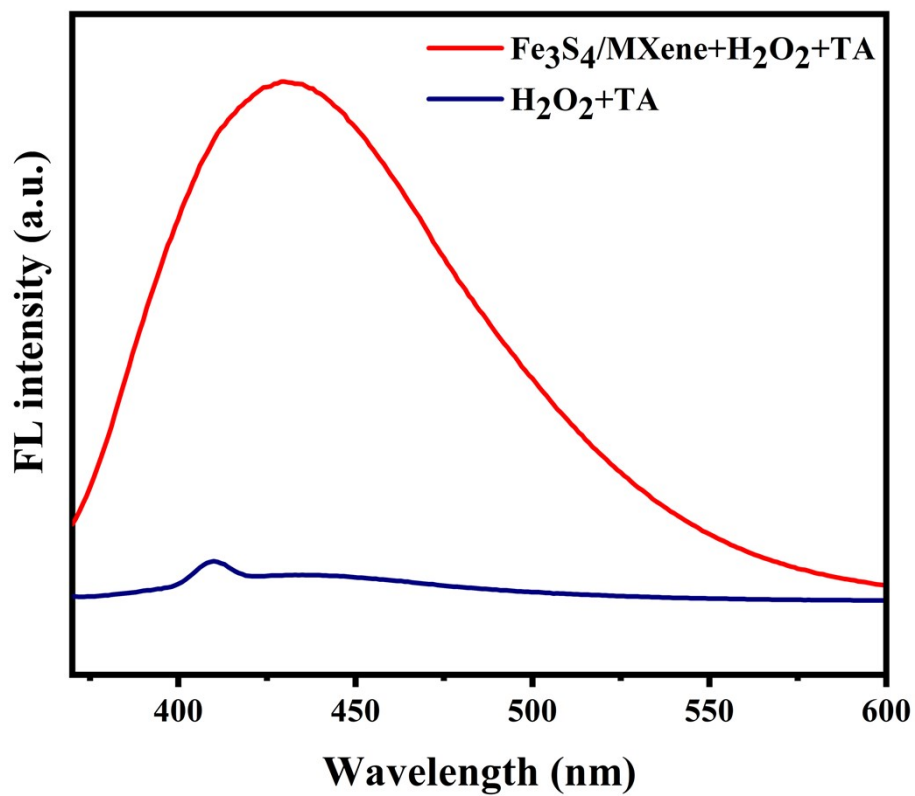

Fig. S5. Fluorescence essay in terephthalic acid.

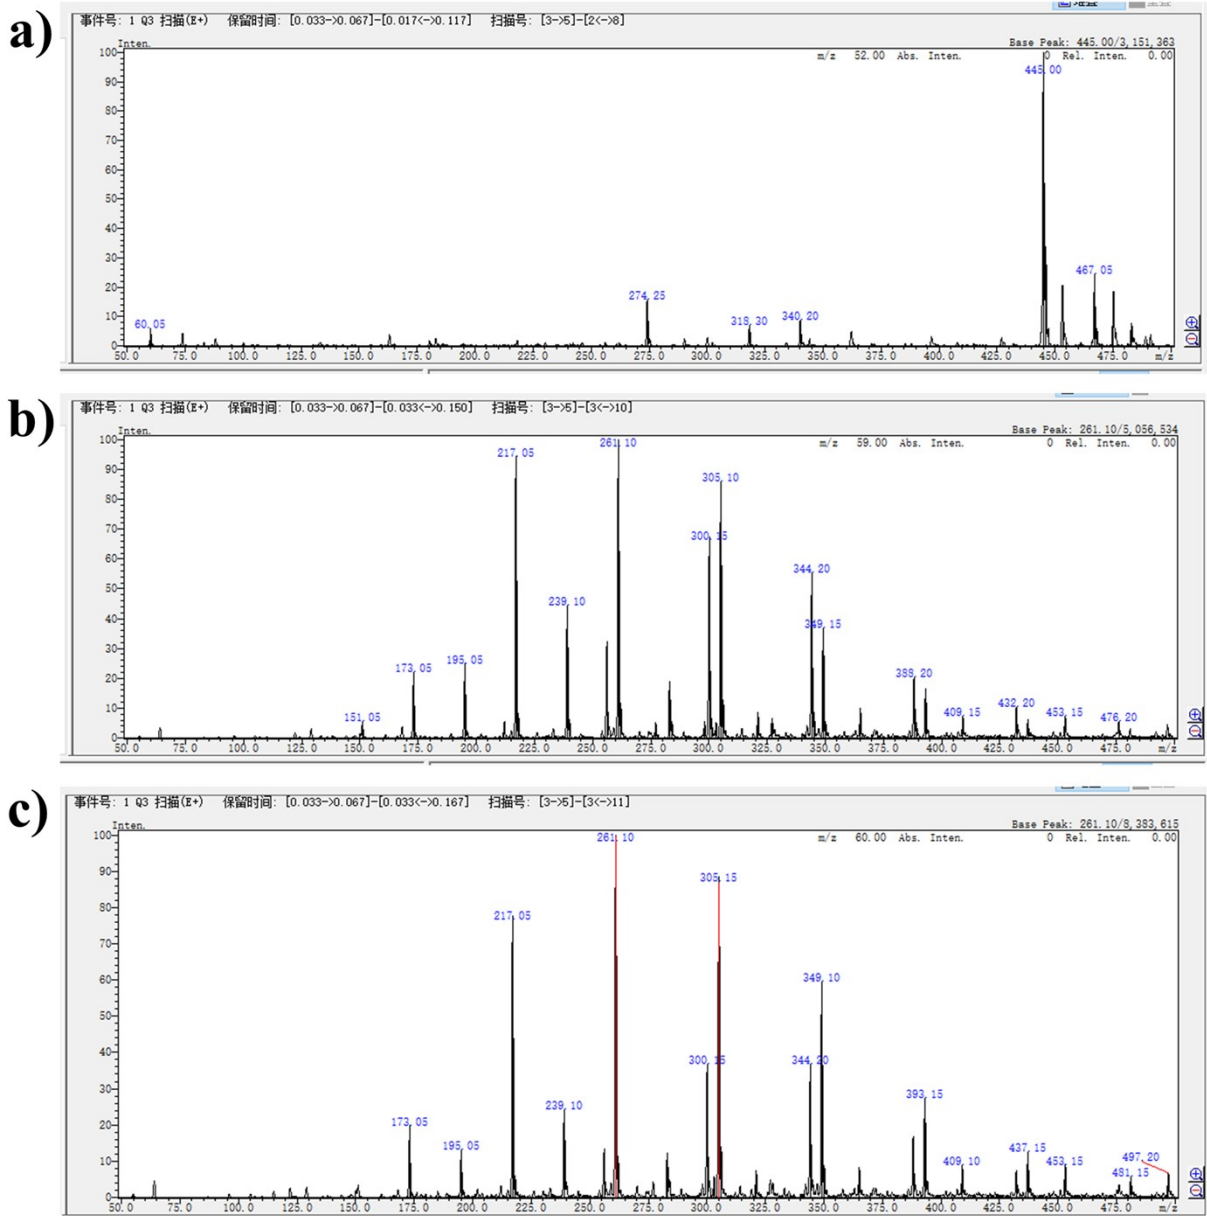

**Fig. S6.** GC/LC-MS spectra of TC a) before degradation b) and c) after degradation in 30 and 90 min respectively in  $\text{Fe}_3\text{S}_4/\text{MXene}+\text{H}_2\text{O}_2$  system.

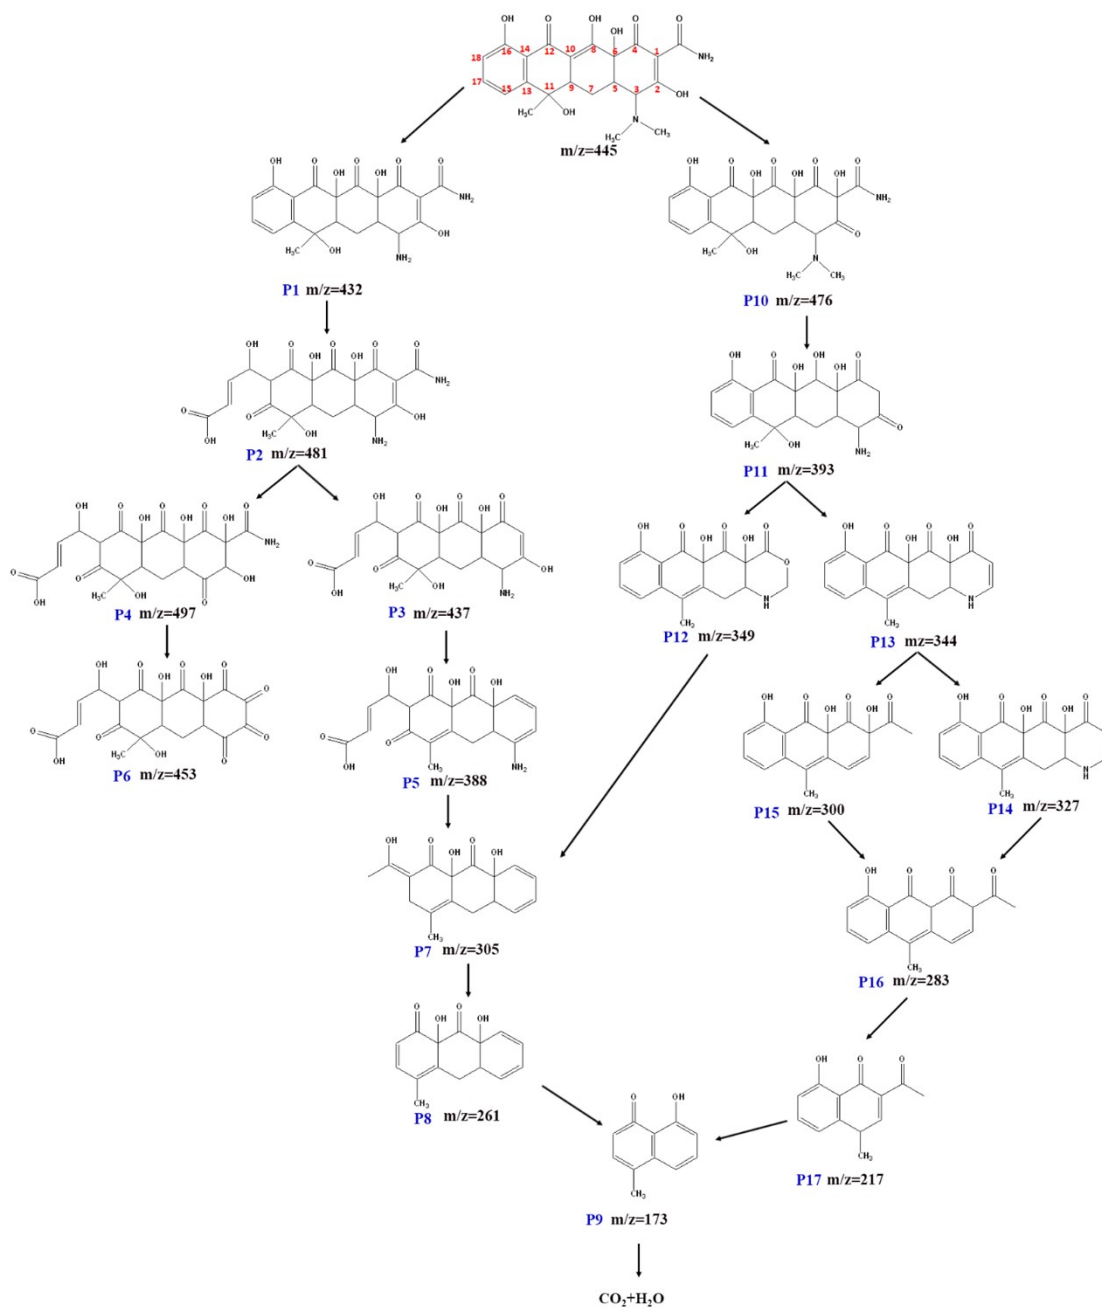

Fig. S7. TC degradation pathway in  $\text{Fe}_3\text{S}_4/\text{MXene} + \text{H}_2\text{O}_2$  system.



| compounds        | Mobile phase          | Flow rate (mL/min) | Wavelength (nm) |
|------------------|-----------------------|--------------------|-----------------|
| Ibuprofen        | Acetonitrile: 40%     | 0.5                | 222             |
|                  | 0.1% Acetic acid: 60% |                    |                 |
| Sulfamethoxazole | Methanol: 70%         | 1                  | 264             |
|                  | 0.2% Acetic acid: 30% |                    |                 |
| Bisphenol A      | Water:70%             | 1                  | 280             |
|                  | Acetonitrile: 30%     |                    |                 |

**Table S1: HPLC conditions for different compounds**

**Table S2.** Surface area, pore volume, and pore size of prepared materials.

| Materials                             | Surface area (m <sup>2</sup> /g) | Pore volume (cm <sup>3</sup> /g) | Pore size (nm) |
|---------------------------------------|----------------------------------|----------------------------------|----------------|
| MXene                                 | 6.92                             | 0.03                             | 16.40          |
| Fe <sub>3</sub> S <sub>4</sub>        | 27.44                            | 0.12                             | 17.30          |
| Fe <sub>3</sub> S <sub>4</sub> /MXene | 10.88                            | 0.05                             | 19.81          |

**Table S3.** Fitted parameters of pseudo-first-order model for TC degradation in different systems.

| <i>Pseudo-first-order model</i>                                     |                      |                             |
|---------------------------------------------------------------------|----------------------|-----------------------------|
| <b>System</b>                                                       | <b>R<sup>2</sup></b> | <b>k (min<sup>-1</sup>)</b> |
| Fe <sub>3</sub> S <sub>4</sub> /MXene+H <sub>2</sub> O <sub>2</sub> | 0.9815               | 0.0338                      |
| Fe <sub>3</sub> S <sub>4</sub> +H <sub>2</sub> O <sub>2</sub>       | 0.9566               | 0.0155                      |
| Fe <sub>3</sub> S <sub>4</sub> /MXene                               | 0.9834               | 0.0090                      |
| MXene+H <sub>2</sub> O <sub>2</sub>                                 | 0.9466               | 0.0060                      |
| Fe <sub>3</sub> S <sub>4</sub>                                      | 0.9715               | 0.0055                      |
| MXene                                                               | 0.9442               | 0.0037                      |
| H <sub>2</sub> O <sub>2</sub>                                       | 0.9166               | 0.0018                      |

**Table S4: Comparison of different catalysts for H<sub>2</sub>O<sub>2</sub> activation in TC removal**

| <b>Catalyst</b>                                                      | <b>Reaction conditions</b>                                                                                                                      | <b>Degradation rate</b> | <b>Time</b> | <b>References</b> |
|----------------------------------------------------------------------|-------------------------------------------------------------------------------------------------------------------------------------------------|-------------------------|-------------|-------------------|
| Fe <sub>3</sub> O <sub>4</sub> nanospheres                           | [H <sub>2</sub> O <sub>2</sub> ]: 50 mM<br>Fe <sub>3</sub> O <sub>4</sub> nanospheres: 0.5 g/L<br>[TC]: 25 mg/L<br>pH: 7                        | 82%                     | 110 min     | [1]               |
| micro-nano bubble                                                    | [H <sub>2</sub> O <sub>2</sub> ]: 30 mM<br>air intakes: 30 mL/min<br>[TC]: 20 mg/L<br>pH: 3                                                     | 92.43%                  | 150 min     | [2]               |
| ZIF-67                                                               | [H <sub>2</sub> O <sub>2</sub> ]: 20 eq vs mol TC<br>ZIF-67: 0.2g/l<br>[TC]:50 mg/L                                                             | 69%                     | 35 min      | [3]               |
| Meso-Fe/Co                                                           | [H <sub>2</sub> O <sub>2</sub> ]: 30 mM<br>Fe/Co: 0.6 g/L<br>[TC]: 30 mg/L<br>pH: 7                                                             | 86%                     | 3h          | [4]               |
| Fe <sub>3</sub> S <sub>4</sub> /Ti <sub>3</sub> C <sub>2</sub> MXene | [H <sub>2</sub> O <sub>2</sub> ]: 1 mM<br>Fe <sub>3</sub> S <sub>4</sub> /Ti <sub>3</sub> C <sub>2</sub> MXene: 1g/L<br>[TC]: 100 mg/L<br>pH: 3 | 90.40%                  | 90 min      | This work         |

## References

- [1] M. Nie, Y. Li, J. He, C. Xie, Z. Wu, B. Sun, K. Zhang, L. Kong, J. Liu, Degradation of tetracycline in water using  $\text{Fe}_3\text{O}_4$  nanospheres as Fenton-like catalysts: kinetics, mechanisms and pathways, *New J. Chem.* 44(7) (2020) 2847-2857. <https://doi.org/10.1039/d0nj00125b>.
- [2] Z. Chen, M. Fu, C. Yuan, X. Hu, J. Bai, R. Pan, P. Lu, M. Tang, Study on the degradation of tetracycline in wastewater by micro-nano bubbles activated hydrogen peroxide, *Environ. Technol.* 43(23) (2021) 3580-3590. <https://doi.org/10.1080/09593330.2021.1928292>.
- [3] W. Hou, Y. Huang, X. Liu, Highly Efficient and Recyclable ZIF-67 Catalyst for the Degradation of Tetracycline, *Catal. Letters* 150(10) (2020) 3017-3022. <https://doi.org/10.1007/s10562-020-03210-2>.
- [4] J. Li, X. Li, J. Han, F. Meng, J. Jiang, J. Li, C. Xu, Y. Li, Mesoporous bimetallic Fe/Co as highly active heterogeneous Fenton catalyst for the degradation of tetracycline hydrochlorides, *Sci. Rep.* 9(1) (2019). <https://doi.org/10.1038/s41598-019-52013-y>.
